# Supplementary material for: Multi-Omics Analysis Reveals Myelin, Presynaptic and Nicotinate Alterations in the Hippocampus of G72/G30 Transgenic Mice
Source: MDPI journal article supplement (doi:10.3390/jpm12020244), 2022-02-09
Supplement: s1 [file s1]

## Supplementary Materials

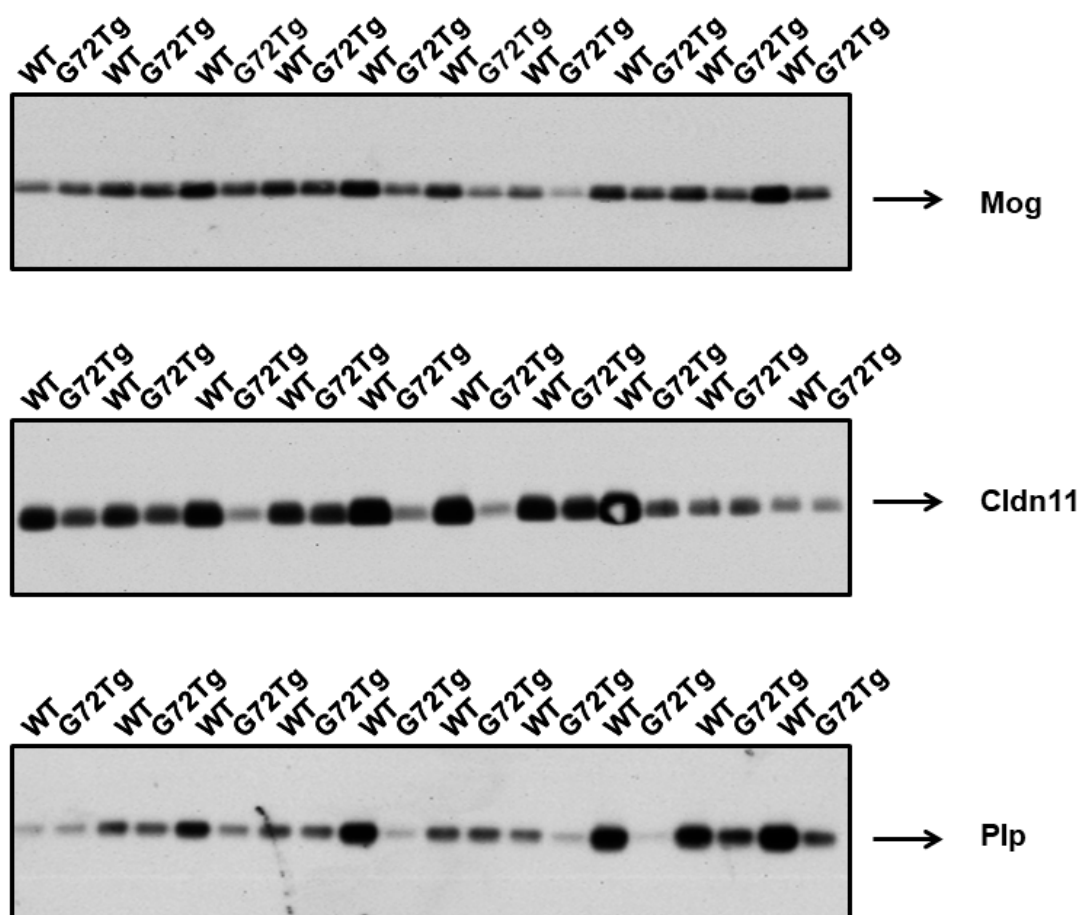

**Figure S1.** Full Western blot data of Mog, Cldn11 and Plp using G72Tg and WT mice hippocampal extracts.

**Table S1.** Raw hippocampal metabolite data of G72Tg and WT mice considered for metabolomics analysis.

| Sample                             | HIP847      | HIP850      | HIP915      | HIP916      | HIP918      | HIP919      | HIP848      | HIP849      | HIP902      | HIP904      | HIP917      | HIP942      |
|------------------------------------|-------------|-------------|-------------|-------------|-------------|-------------|-------------|-------------|-------------|-------------|-------------|-------------|
| Metabolite                         | G72         | G72         | G72         | G72         | G72         | G72         | WT          | WT          | WT          | WT          | WT          | WT          |
| 1,3-diphosphateglycerate           | 489588.4856 | NA          |
| 1-methyladenosine                  | 8484889.586 | 5389677.27  | 4535024.175 | 2546503.19  | 5677379.895 | 2822281.851 | 3432989.219 | 8683247.275 | 6493984.525 | 4163150.196 | 1949136.542 | 1195639.977 |
| 1-methyl-histidine                 | 830285.235  | 950195.4381 | 1089152.495 | 774994.9423 | 1429584.201 | 1133781.313 | 692349.6105 | 972785.6242 | 1268456.948 | 1142385.97  | 693568.5678 | 521549.5466 |
| 2,3-dihydroxybenzoic acid          | 804496.3252 | 458777.1382 | 339471.0734 | 145717.7654 | 285251.1425 | 211832.2067 | 38149.25458 | 433613.6522 | 213446.3499 | 291486.04   | 120366.866  | 147142.9259 |
| 2,3-diphosphoglyceric acid         | 201781.6759 | 19478.86699 | NA          | NA          | 11341.21684 | NA          | 22271.8656  | 13419.55831 | 29543.8351  | NA          | NA          | NA          |
| 2-aminooctanoic acid               | 13302223    | 14993201.26 | 5722098.952 | 6310497.343 | 7035164.475 | 3498877.022 | 14855930.36 | 26467538.7  | 5048460.682 | 16619631.52 | 6238360.564 | 2098144.697 |
| 2-dehydro-D-gluconate              | 31374.45467 | 17610.75823 | 20947.81213 | 10508.89817 | 27214.08905 | NA          | 21207.97943 | 15928.93006 | NA          | 8748.563665 | 16671.80386 | 16023.37192 |
| 2-deoxyglucose-6-phosphate         | 23168492.59 | 9795125.53  | 10545007.32 | 4919020.421 | 11382299.38 | 6518667.788 | 7571772.587 | 8221603.3   | 13017969.93 | 8127730.277 | 4400880.862 | 3572982.084 |
| 2-hydroxy-2-methylbutanedioic acid | 1003538.488 | 617727.6208 | 402297.3677 | 422708.5708 | 574652.5434 | 417761.2139 | 533195.9406 | 562545.8418 | 498005.6888 | 898495.2818 | 327396.1828 | 551323.8418 |
| 2-hydroxygluturate                 | 2913085.142 | 1864315.088 | 1532287.644 | 1137673.851 | 2218707.591 | 873676.3595 | 1158794.35  | 1499345.085 | 1552979.937 | 1828820.83  | 682671.4672 | 667630.4098 |
| 2-isopropylmalic acid              | 106889886.8 | 95733156.81 | 85076879.87 | 75910420.89 | 99993811.71 | 83836579.71 | 122989090.3 | 87146505.25 | 79048455.91 | 71665982.91 | 76813878.22 | 105543014.7 |
| 2-ketohaxanoic acid                | 97842.72877 | 15848.92914 | NA          | 40313.20208 | 44772.5034  | 9416.313466 | 178500.7601 | 40466.80152 | 31072.46783 | 41878.53452 | 45792.44341 | 34862.22328 |
| 2-keto-isovalerate                 | 13418005.81 | 8772607.981 | 8371186.408 | 7058299.073 | 9667288.472 | 7321090.796 | 9794191.897 | 8366416.726 | 6817318.74  | 5538889.321 | 8688242.728 | 9542162.821 |
| 2-oxo-4-methylthiobutanoate        | 90787.31185 | 109606.4293 | 20393.09617 | 99726.18362 | 70342.73438 | 90436.16438 | 92872.52298 | 114857.9531 | 49246.73763 | 27864.0411  | 90767.65195 | 76103.88439 |
| 2-oxobutanoate                     | 322623.9113 | 190122.215  | 224127.8534 | 187763.447  | 310486.3716 | 222078.8007 | 239387.0404 | 109574.6768 | 159391.1594 | 218497.1078 | 197131.0751 | 257830.0119 |
| 3-hydroxy-3-methylglutaryl-CoA     | NA          |
| 3-hydroxybutyryl-CoA               | NA          |
| 3-methylphenylacetic acid          | 16753.44205 | NA          | NA          | NA          | 13133.68264 | 7842.665117 | 19220.15461 | NA          | NA          | NA          | NA          | 24564.05523 |
| 3-phosphoglycerate                 | 2578310.777 | 827900.0744 | 243129.6394 | 38001.09198 | 301054.6756 | 59843.74048 | 841267.9603 | 250540.0688 | 1074941.409 | 104727.0146 | 351128.3854 | 119008.9666 |
| 3-phospho-serine                   | NA          | NA          | 6337.540157 | 10993.37562 | 10854.6804  | 15112.39327 | 21803.22983 | 8231.631461 | 9140.477311 | 12353.09479 | 7269.788678 | NA          |
| 3-S-methylthiopropionate           | 13801.10868 | NA          | 12868.26608 | NA          | 13462.75499 | 11912.53783 | NA          | NA          | NA          | NA          | NA          | 7251.997611 |
| 4-aminobutyrate                    | 51578887.84 | 46349630.17 | 45162525.83 | 31819747.23 | 53367020.51 | 35113272.92 | 31615548.38 | 40974712.85 | 51991414.31 | 48310176.99 | 24136910.43 | 19290782.95 |
| 4-pyridoxic acid                   | 291365.592  | 119484.121  | 327786.7659 | 102060.2687 | 213312.8723 | 52598.66478 | 25572.98994 | 115614.7317 | 164784.7462 | 195835.8084 | 52291.43705 | 44328.10625 |
| 5-methoxytryptophan                | NA          | NA          | NA          | NA          | NA          | 8236.569412 | NA          | NA          | NA          | NA          | NA          | NA          |
| 5-methyl-THF                       | 26901.65393 | 44073.8653  | 20268.43926 | 46680.49016 | 39841.67685 | 29496.23313 | 18803.47193 | 38397.58401 | 19455.3995  | 29624.71354 | 12890.66184 | 12084.59954 |
| 5-phosphoribosyl-1-pyrophosphate   | 93869.49401 | 71515.50643 | 82986.39235 | 52566.15918 | 57676.69794 | 42564.17717 | 46416.28343 | 62642.56808 | 62619.95587 | 47704.80744 | 29840.77811 | 21704.62517 |
| 6-phospho-D-gluconate              | 181453.0522 | 186085.3739 | 72014.79882 | 63024.65709 | 106922.9912 | 41847.78399 | 117309.0414 | 89795.37571 | 232195.2786 | 129220.6803 | 48657.97308 | 36115.74512 |
| 7,8-dihydrofolate                  | NA          |
| 7-methylguanosine                  | 185451.249  | 113824.1626 | 89565.53148 | 93187.61206 | 127351.7327 | 69810.82395 | 67805.92544 | 97234.31202 | 122663.3319 | 87284.39042 | 43862.01135 | 36757.38367 |
| acadesine                          | 21263.24807 | 26579.58058 | 18336.98111 | 6948.152298 | 24843.30484 | NA          | 8817.443971 | NA          | 12809.38397 | NA          | NA          | 12358.02738 |
| acetoacetate                       | 337056.7203 | 259876.6231 | 169419.8607 | 159056.2677 | 256230.9531 | 217901.6079 | 252111.4068 | 165806.994  | 132055.728  | 139479.0252 | 147083.8603 | 334853.4101 |
| acetoacetyl-CoA                    | 47626.84134 | 31051.16202 | 12941.87342 | 27435.84901 | 20251.63405 | 22370.26656 | 15530.41007 | 17604.73656 | 16566.78256 | 5695.346103 | 16566.78256 | 5695.346103 |
| acetylcarnitine DL                 | 125217149.2 | 122915926.7 | 119393964   | 128689594.2 | 131448893.4 | 133502722.5 | 127592701.1 | 141940432.1 | 127536949.1 | 113349459.9 | 115822313.2 | 124282317.6 |
| acetyl-CoA                         | 937578.0449 | 182425.0241 | 384776.6475 | 289904.4975 | 218259.1068 | 368996.5054 | 277174.9561 | 205559.7241 | 348523.8431 | 166486.6628 | 216098.1694 | 340410.9638 |
| acetyllysine                       | 33775702.63 | 17023499.36 | 11200726.31 | 8412664.469 | 22283285.22 | 6842491.362 | 10562073.27 | 13209605.61 | 27392394.79 | 21007198.99 | 8312496.158 | 2848166.289 |
| acetylphosphate                    | 658567.7992 | 481400.9473 | 383761.031  | 238124.292  | 510097.2981 | 387362.7481 | 347615.402  | 408527.2247 | 468191.258  | 378547.5975 | 246500.9223 | 269543.9903 |
| aconitate                          | 306372.947  | 334223.2641 | 385855.5234 | 396742.7376 | 388874.5296 | 299373.2078 | 308952.7514 | 371598.3826 | 252618.2002 | 192989.8442 | 313829.266  | 524670.8854 |
| adenine                            | 14229644.89 | 9260072.333 | 6764570.861 | 5042824.044 | 8785400.087 | 6315491.19  | 5002646.941 | 8361086.746 | 10982006.09 | 7131104.07  | 4239335.037 | 2515758.097 |
| adenosine                          | 1928320.558 | 1060163.898 | 1241287.305 | 885074.6665 | 1301855.044 | 897096.752  | 852738.3335 | 964054.6819 | 3524168.318 | 1069692.735 | 626374.7415 | 397200.9913 |
| adenosine 5-phosphosulfate         | 145859.9676 | 117002.6192 | 100926.2652 | 71959.83617 | 105908.9504 | 79693.40374 | 88628.49972 | 99869.82609 | 75614.58194 | 72481.36454 | 74018.42005 | 47498.6125  |
| ADP-D-glucose                      | 47722.69207 | 15014.92664 | 16047.83695 | 15461.8972  | 30603.33303 | 18642.46686 | 16565.92126 | 19154.38107 | 15448.44108 | 21229.99437 | 15531.60329 | 8805.259077 |

|                                           |             |             |             |             |             |             |             |             |             |             |             |             |
|-------------------------------------------|-------------|-------------|-------------|-------------|-------------|-------------|-------------|-------------|-------------|-------------|-------------|-------------|
| ADP                                       | 23709108.57 | 16947081.55 | 12914863.13 | 10569494.8  | 15938047.5  | 12172139.66 | 12827600.27 | 13619008.89 | 10710619.4  | 6797512.674 | 9924110.75  | 6813952.254 |
| a-ketoglutarate                           | 517894.9448 | 209772.499  | 175794.992  | 94737.61602 | 469519.7828 | 91146.23703 | 426350.9054 | 303428.9501 | 222733.7461 | 164318.0959 | 177841.5878 | 452837.1159 |
| alanine                                   | 53977172.75 | 42895261.72 | 44022244.72 | 40969261.81 | 51028394.42 | 38649350.58 | 34164998.39 | 43188597.57 | 56349161.44 | 48637104.85 | 29086749.06 | 25269795.83 |
| allantoate                                | 162817.5804 | 102379.2222 | 78008.94825 | 70292.77551 | 99076.94779 | 51531.58396 | 115022.9062 | 90684.9184  | 67481.08537 | 41101.35021 | 94323.59916 | 71623.51261 |
| allantoin                                 | 537219.1737 | 339624.9197 | 206211.9469 | 120167.6565 | 244694.0494 | 124945.4823 | 156836.7884 | 180817.9416 | 190598.2811 | 164541.2076 | 134321.0791 | 167924.3506 |
| aminoadipic acid                          | 375872.2758 | 158078.2827 | 103175.2171 | 97318.70331 | 228044.2588 | 107746.786  | 175002.95   | 202763.9276 | 114156.1268 | 99965.79706 | 128795.0816 | 168287.5514 |
| aminoimidazole carboxamide ribonucleotide | 10814.8103  | 23540.32519 | 32467.39551 | NA          | 25844.34247 | 29510.39499 | 13173.4042  | 18473.41933 | 19183.05218 | 9699.708433 | 24799.98708 | 18156.31744 |
| AMP                                       | 133444573.2 | 86442808.37 | 113371726.7 | 122317004.8 | 78205984.19 | 113313464.9 | 105518452.2 | 123171110.9 | 125847273.5 | 117207585.1 | 114456134.5 | 101424730.3 |
| anthranilate                              | 984629.3032 | 692267.2723 | 440673.5792 | 371490.8158 | 756213.5686 | 235635.2734 | 290848.5525 | 531404.2943 | 793294.7663 | 789685.876  | 322403.4107 | 156062.4727 |
| arginine                                  | 22478861.46 | 13947768.99 | 13550644.43 | 8016398.715 | 17036213.93 | 8843147.831 | 6423772.912 | 11307422.58 | 24224029.32 | 16983324    | 4405452.125 | 5580571.999 |
| ascorbic acid                             | 87779553.68 | 58755552.1  | 48652384.34 | 41871041.98 | 59664285.27 | 45083393.88 | 76500682.84 | 51834919.29 | 42259106.17 | 36309040.62 | 42976239.24 | 58266577.81 |
| asparagine                                | 4039264.266 | 3252784.64  | 4037819.943 | 2567768.47  | 3720682.008 | 3227180.466 | 1903130.1   | 3064335.107 | 3926337.009 | 3467516.872 | 2438250.942 | 1658533.402 |
| aspartate                                 | 18820847.1  | 28086643.73 | 29334957.03 | 23224375.2  | 27025243.98 | 21402059.9  | 23037545.6  | 26584699.26 | 18695703.84 | 27403793.7  | 25873629.51 | 15956117.46 |
| ATP                                       | 9039870.908 | 7168939.803 | 5227335.825 | 3677557.141 | 6741674.426 | 5676749.442 | 4155756.475 | 4897089.287 | 7602306.58  | 3279255.06  | 4416372.262 | 2175990.189 |
| atrolactic acid                           | 281353.717  | 266094.8698 | 175723.0345 | 195385.5215 | 226062.8794 | 71798.81922 | 123400.8604 | 127055.1361 | 161928.357  | 137453.447  | 121017.3463 | 68301.00465 |
| betaine                                   | 49848328.56 | 54479138.59 | 40972617.28 | 50391124.23 | 38708529.47 | 52658182.51 | 75492795.82 | 66910666.89 | 47806801.29 | 58362835.24 | 58338953.07 | 67729551.85 |
| betaine aldehyde                          | 230246.0146 | 194123.6251 | 217994.2758 | 205642.4851 | 250540.1021 | 183630.1185 | 269371.6279 | 196149.7701 | 225843.8462 | 200029.1465 | 200199.0432 | 236667.8735 |
| biotin                                    | 93826.21424 | NA          | NA          | NA          | 79258.34497 | 65782.39457 | NA          | 631109.5119 | NA          | NA          | NA          | 49944.68005 |
| butyryl-CoA                               | NA          |
| carbamoyl phosphate                       | 128277998.6 | 103949056.5 | 103457012   | 71684204.94 | 110495708   | 79298164.03 | 77641924.51 | 99465243.76 | 93488768.77 | 79466462.23 | 82836121.45 | 60011532.05 |
| carnitin                                  | 40766639.99 | 41077678.82 | 54155398.24 | 37386162.06 | 48754719.43 | 58360403.83 | 55784354.23 | 45629044.85 | 46287334.75 | 41422080.22 | 50276143.4  | 50247418.65 |
| CDP-choline                               | 314197.1588 | 177970.1779 | 169081.5022 | 96290.62414 | 207880.7459 | 119867.3879 | 208892.6866 | 195211.6703 | 160163.4331 | 132041.8569 | 262308.6924 | 225683.3703 |
| CDP-ethanolamine                          | 533068.973  | 316813.8661 | 297856.7782 | 276998.2453 | 414815.873  | 259972.565  | 276450.7332 | 285138.2349 | 326707.7901 | 215337.633  | 268206.7776 | 241191.2063 |
| CDP                                       | 144690.5633 | 188125.7243 | 98620.32699 | 77038.15667 | 83028.50954 | 86245.12477 | 103984.0293 | 128306.2703 | 93875.45274 | 69278.7812  | 48187.62465 | 61334.14337 |
| cellobiose                                | 12504.5048  | 11859.97173 | 33266.47138 | NA          | 11387.25574 | 8821.889822 | 20285.18609 | 21829.50822 | 17194.88439 | 10506.9316  | 8322.897298 | 15984.2193  |
| cholesteryl sulfate                       | 287276.1078 | 287883.1307 | 128847.0199 | 488715.0505 | 271371.2869 | 169761.3103 | 110314.5372 | 179906.8044 | 1566442.662 | 783950.0564 | 54875.6471  | 77136.58467 |
| cholic acid                               | NA          |
| choline                                   | 1170180.507 | 402733.4546 | 299789.8636 | NA          | 821711.7687 | NA          | NA          | 1008497.19  | 687280.0603 | NA          | NA          | 480954.2622 |
| citraconic acid                           | 63610.26605 | 20005.31396 | 52100.08408 | 189948.3803 | 60694.83914 | 52967.84366 | 112546.3108 | 22681.12158 | 240498.0119 | 100508.9398 | 44346.12779 | 94620.02131 |
| citrate                                   | 22858086.34 | 18626808.39 | 16066112.89 | 12454920.84 | 15417690.35 | 13330032.94 | 20964073.89 | 17373376.49 | 13644623    | 11028128.45 | 10095109.43 | 15075186.57 |
| citrate-isocitrate                        | 52182666.56 | 45885977.3  | 35852388.92 | 26546783.4  | 34834043.6  | 29255874.26 | 50130656.03 | 32985480.64 | 30706013.56 | 22489988.28 | 24699222.32 | 35236820.88 |
| citrulline                                | 963740.4082 | 1095158.536 | 899627.3324 | 899585.5683 | 1122403.268 | 1044953.344 | 656767.0858 | 920032.7669 | 1211603.525 | 944588.4042 | 860939.1028 | 875609.837  |
| CMP                                       | 3019381.884 | 2381218.029 | 2766830.245 | 3159724.823 | 3238952.413 | 2964223.955 | 2226107.898 | 2968789.274 | 3208291.468 | 2663986.482 | 2324403.535 | 2393079.973 |
| coenzyme A                                | 4226568.059 | 955688.0683 | 1218575.575 | 364311.888  | 1803366.023 | 1885257.302 | 2144574.242 | 1547687.029 | 1745790.016 | 465124.9642 | 1383685.922 | 1892131.516 |
| creatine                                  | 315613083.1 | 285955876   | 298846391.8 | 274911076.9 | 311878504.1 | 249184745.2 | 239866590.5 | 329256207.6 | 326310881.2 | 285873679.6 | 210911766   | 187651611.8 |
| creatinine                                | 19833993.84 | 12934975.4  | 13115547.14 | 10612978.02 | 17114411.75 | 9821228.978 | 7831809.989 | 17701737.93 | 18549889.07 | 15590911.28 | 6113209.513 | 5116151.829 |
| CTP                                       | 286414.6251 | 176186.3491 | 91484.52751 | 83309.40099 | 171352.8885 | 159390.7006 | 101416.6    | 155309.301  | 198250.2974 | 110241.7782 | 46333.61138 | 68902.37568 |
| cyclic bis(3->5) dimeric GMP              | NA          |
| cyclic-AMP                                | 3236196.833 | 1226257.92  | 943083.3304 | 443924.8089 | 1222599.309 | 388471.0716 | 669169.1442 | 1044265.574 | 1543233.094 | 550363.3018 | 564036.3411 | 339428.8097 |
| cystathionine                             | 644645.8886 | 749381.5802 | 532679.1495 | 542345.6839 | 617600.7483 | 638855.8803 | 712785.1905 | 912083.6897 | 770608.4363 | 480141.3604 | 232653.8817 | 584352.931  |
| cysteine                                  | 156020.0452 | 23491.94456 | 25355.95699 | NA          | 30924.11593 | 39450.5796  | 68317.44018 | 48288.21822 | NA          | 21559.03536 | 38456.29102 | 35571.06851 |
| cystine                                   | 51213.18905 | 37579.33366 | 11962.71662 | 21797.10841 | 29230.7058  | 31361.15483 | 26899.95087 | 11799.97405 | 44993.46244 | 27885.85743 | 29760.61382 | 18385.59541 |
| cytidine                                  | 3954012.122 | 392425.8156 | 304534.45   | 1543884.124 | 352298.916  | 441140.7124 | 2409976.914 | 391346.6868 | 3687668.126 | 895629.6606 | 442721.2615 | 1111462.096 |
| cytosine                                  | NA          | 110913.6914 | 107755.9746 | 41440.49127 | 134810.7713 | 65901.58807 | 95761.8129  | 158994.7547 | 112703.0959 | 109430.7298 | 69403.68196 | NA          |
| dAMP                                      | 437726.5012 | 341930.9951 | 355090.4374 | 220136.5595 | 390076.9239 | 292347.2986 | 417790.6406 | 444591.1858 | 371871.0247 | 247500.0608 | 519133.6266 | 158926.1611 |

|                                   |             |             |             |             |             |             |             |             |             |             |             |             |
|-----------------------------------|-------------|-------------|-------------|-------------|-------------|-------------|-------------|-------------|-------------|-------------|-------------|-------------|
| dATP                              | NA          |
| dCDP                              | 10353.6726  | 12423.57914 | NA          | 8284.321195 | 17605.26895 | 7246.547278 | 8283.057358 | 10333.62773 | NA          | NA          | NA          | NA          |
| dCMP                              | 32612.06639 | 33626.49107 | 37767.95115 | 29507.07187 | 49698.54446 | 32397.32755 | 47500.49103 | 42485.66983 | 39863.31653 | 35666.60426 | 23291.03053 | 26569.88429 |
| dCTP                              | NA          | 5695.407983 | NA          | NA          | NA          |
| deoxyadenosine                    | NA          | 86717.15367 |
| deoxycholic acid                  | 22151.35548 | 15013.28347 | 6728.276459 | NA          | NA          | 2541800.406 | 20645.20227 | 7760.082038 | NA          | 6219.030467 | 9837.123397 | NA          |
| deoxyguanosine                    | 53153.92229 | 48525.39258 | 47326.47387 | 32508.29745 | 25576.44437 | 27405.01253 | 38872.72832 | 28768.36495 | 45452.09309 | 36175.62559 | 19128.45235 | 11431.0761  |
| deoxyinosine                      | NA          | NA          | NA          | NA          | 14178.78926 | NA          | NA          | 9400.95122  | 7856.696698 | NA          | NA          | NA          |
| deoxyribose-phosphate             | 293046.3731 | 114135.1799 | 118380.8128 | 170819.214  | 74877.71651 | 120556.1975 | 163560.1093 | 95404.92661 | 94648.16148 | 139192.6224 | 136624.495  | 104354.7807 |
| deoxyuridine                      | 112853.9906 | 29000.19206 | 15530.9029  | NA          | 37792.12561 | 10397.92541 | 21219.44728 | 23526.77256 | 22779.44631 | 14496.21509 | 13484.68099 | 26281.54693 |
| dephospho-CoA                     | 1460859.012 | 601168.9187 | 432268.4201 | 781673.0727 | 892440.2277 | 1108480.005 | 587064.4208 | 814599.582  | 944327.3993 | 788546.988  | 366770.5115 | 1199208.785 |
| D-erythrose-4-phosphate           | 1924381.45  | 1043159.627 | 790788.8678 | 474910.2209 | 766020.9572 | 524186.6272 | 539952.9492 | 663004.3061 | 669057.5847 | 500282.9046 | 394058.6884 | 286134.9057 |
| dGDP                              | 22220886.59 | 16429145.36 | 13889231.18 | 10255925.84 | 16147532.04 | 12626259.22 | 13175058.75 | 13998493.11 | 11055061.12 | 7205702.95  | 10425410.43 | 7347423.47  |
| D-glucarate                       | NA          | 62231.11356 | 58001.29894 | 77951.91288 | 50279.43061 | 54539.44294 | 36721.93813 | 43897.41635 | 27705.14684 | 49236.49039 | NA          | 46697.38339 |
| D-gluconate                       | 215601.2483 | 119067.6171 | 75572.6516  | 68287.63484 | 99580.22438 | 53122.1614  | 65927.30625 | 88338.32553 | 74724.77828 | 55149.07424 | 35170.6156  | 58074.26832 |
| D-glucono-1,5-lactone-6-phosphate | 86472.80297 | 74576.58131 | 35844.72431 | 15448.63035 | 56565.90462 | 34181.81291 | 29816.65698 | 22710.05574 | 8045.492754 | 37752.61042 | 23133.93471 | 9285.946431 |
| D-glucosamine-1-phosphate         | 25872.97994 | 18637.79638 | 38228.69402 | 23287.435   | 35609.94224 | 25118.38487 | 25837.35261 | 24949.63872 | 20644.0754  | 29954.09912 | 27419.92354 | 17685.43028 |
| D-glucosamine-6-phosphate         | 19890.84725 | 31733.1525  | 23955.24711 | 17535.1688  | 13981.39776 | 15297.25534 | 12892.06074 | 24849.39044 | 28427.30755 | 22687.4191  | 16572.68158 | NA          |
| D-glyceraldehyde-3-phosphate      | 1210966.991 | 4162299.929 | 1361155.815 | 1352590.079 | 2030950.171 | 3135516.125 | 419488.3875 | 1827416.09  | 1386409.115 | 1722695.992 | 1200336.356 | 1296004.682 |
| dGMP                              | 64592.68912 | 35379.44821 | 44345.04203 | 37009.71049 | 34972.09232 | 17604.84142 | 14744.88096 | 46563.61464 | 25968.87285 | 27452.74692 | 34103.65391 | 18332.24873 |
| dGTP                              | 8997120.563 | 6920202.993 | 5001710.037 | 3600112.964 | 6310231.548 | 5676018.281 | 3756436.122 | 4519587.723 | 7174687.364 | 3401997.755 | 4380778.152 | 2140344.471 |
| dihydroorotate                    | 498874.1863 | 291122.9574 | 250522.221  | 248368.6553 | 265620.2959 | 247137.0842 | 309405.0548 | 273484.6654 | 134220.3251 | 212374.3302 | 307785.5298 | 503700.5511 |
| dihydroxy-acetone-phosphate       | 2453019.591 | 5824435.732 | 2007540.608 | 2092551.107 | 2846912.382 | 4000621.263 | 785078.7547 | 2671993.125 | 2400569.816 | 2810416.699 | 1692407.221 | 1814457.436 |
| diiodothyronine                   | NA          |
| dimethylglycine                   | 854285.5148 | 786650.3861 | 530905.5989 | 522647.6382 | 868830.4929 | 566609.1445 | 449425.9016 | 675013.6358 | 645164.3645 | 848624.3521 | 324878.3628 | 339628.9464 |
| DL-pipecolic acid                 | 103104161.4 | 72144597.56 | 3359516.96  | 69442409.84 | 84287633.7  | 57102761.6  | 55436696.44 | 72383215.24 | 98776310.26 | 77858825.68 | 52256832.19 | 43570241.74 |
| D-sedoheptulose-1-7-phosphate     | 1701407.396 | 1432663.44  | 628467.9484 | 422837.6968 | 829956.5619 | 656948.7506 | 750398.0649 | 645117.2475 | 834928.2654 | 670855.4464 | 587641.036  | 709966.7323 |
| dTDP                              | 38826.18499 | 16565.22868 | 10916.49447 | 14498.37868 | 25369.34327 | 10873.05557 | NA          | 6732.8336   | 8280.774739 | 10353.97416 | NA          | NA          |
| dTMP                              | 94067.82115 | 79120.04164 | 42449.85952 | 77135.98741 | 58374.08856 | 49699.92328 | 26893.63664 | 28268.63412 | 86941.00857 | 33916.64259 | 6087.335872 | 13939.6678  |
| dTTP                              | NA          | NA          | NA          | 6212.171775 | NA          | 7248.443037 | NA          | NA          | 8801.26632  | NA          | NA          | NA          |
| dUMP                              | 226236.7382 | 89080.55094 | 69883.57366 | 68908.0868  | 102275.4376 | 54364.51555 | 31055.41572 | 64715.07644 | 113396.7482 | 62126.13327 | 23810.80688 | 15534.17471 |
| dUTP                              | NA          | NA          | NA          | NA          | 7765.619081 | 8732.649151 | NA          | NA          | NA          | NA          | NA          | NA          |
| ethanolamine                      | 173751.5021 | 116361.8939 | 165002.3497 | 112091.8176 | 144449.6085 | 95515.00936 | 62975.61868 | 128543.4963 | 141522.8054 | 137813.2896 | 80760.18683 | 94572.54718 |
| FAD                               | 2445690.984 | 1474722.775 | 1453113.46  | 1038202.029 | 2014778.694 | 1435408.479 | 833391.2989 | 1705174.529 | 1495490.325 | 1029514.641 | 882884.608  | 1006437.956 |
| flavone                           | NA          | 53079.40077 | 15474.47077 | 28841.28612 | NA          | 9140.615864 | 24780.36638 | 39753.97093 | 42499.11696 | 45205.98268 | 15737.42721 | 9286.735733 |
| FMN                               | NA          |
| folate                            | 159482.9164 | 138738.0437 | 129937.0665 | 59583.06185 | 128342.4242 | 62567.18928 | 52335.38386 | 126304.8068 | 187983.8378 | 140741.7896 | 26921.88662 | 26913.70826 |
| fructose-1,6-bisphosphate         | 19341991.92 | 14100264.21 | 6056011.482 | 10085211.18 | 9003581.745 | 4530715.371 | 4071491.554 | 8893754.32  | 13442125.24 | 8898602.561 | 2559315.375 | 981343.4061 |
| fructose-6-phosphate              | 620108.5023 | 505235.3498 | 194573.9129 | 175041.5621 | 236086.1227 | 206615.1257 | 132395.0824 | 223069.6483 | 367602.9102 | 250850.3217 | 143282.5332 | 88048.94543 |
| fumarate                          | 13485312.21 | 8591191.202 | 9016540.34  | 7591507.532 | 9423799.847 | 7509410.262 | 10483732.47 | 8823219.034 | 6912344.891 | 5950286.638 | 8558338.032 | 9972413.871 |
| GDP                               | 2707547.805 | 1123722.431 | 714967.6433 | 465401.9617 | 856571.7206 | 549213.2578 | 976036.9785 | 1241908.77  | 974518.5917 | 485947.5653 | 435291.0782 | 339626.616  |
| geranyl-PP                        | 111900.3046 | 89328.63168 | 89685.498   | 31046.4598  | 53108.9741  | 37926.40561 | 72708.19926 | 61592.52686 | NA          | NA          | 36117.08151 | 21075.10193 |
| glucono-1,5-lactone               | 107674.9445 | 87945.32501 | 77317.33052 | 41375.46107 | 82813.60219 | 42521.88975 | 46836.59201 | 66812.32421 | 61234.4716  | 43581.40115 | 28929.37038 | 27438.24375 |
| glucosamine                       | 274632.1957 | 286039.2305 | 198262.6418 | 172649.8373 | 65833.38654 | 87294.34392 | 310144.1409 | 356931.6817 | 270768.6552 | 222379.6801 | 190670.5346 | 103516.4996 |
| glucose-1-phosphate               | 777645.9579 | 853291.6814 | 569992.0675 | 274315.9559 | 456644.6816 | 382857.275  | 474699.1661 | 694127.287  | 635628.0476 | 390557.897  | 228073.3887 | 248096.7342 |

|                                       |             |             |             |             |             |             |             |             |             |             |             |             |
|---------------------------------------|-------------|-------------|-------------|-------------|-------------|-------------|-------------|-------------|-------------|-------------|-------------|-------------|
| glucose-6-phosphate                   | 428377.1105 | 396757.1877 | 198504.5417 | 172962.9789 | 213168.7048 | 242868.4927 | 259010.1132 | 212429.339  | 255809.7135 | 195504.7244 | 178327.1876 | 92225.45841 |
| glutamate                             | 145479959.6 | 119843932.5 | 121417454.4 | 107853420.9 | 147661072.4 | 109763697.1 | 99840394.76 | 102754676.7 | 146533547   | 127166957.7 | 99503694.63 | 86147969.56 |
| glutamine                             | 103073808.5 | 113129792   | 118941993.6 | 97349048.91 | 117299716.1 | 110158377.4 | 101455132.4 | 106414846.3 | 121000449.9 | 109478375.4 | 96435705.07 | 84264135.48 |
| glutathione                           | 45558078.7  | 16706122.75 | 20113455.14 | 5389696.917 | 20934367.92 | 21802500.43 | 32738095.96 | 26639819.58 | 23756247.1  | 7347215.803 | 21202696.71 | 22056135.36 |
| glutathione disulfide                 | 13895845.94 | 24673402.01 | 20809087.25 | 20193380.02 | 24273354.67 | 15665246.81 | 12344007.07 | 20240636.44 | 16951430.68 | 18122387.04 | 11447566.24 | 7705343.069 |
| glycerate                             | 293174.5457 | 330939.3347 | 294058.972  | 641422.2596 | 492031.8324 | 238225.3807 | 65492.42844 | 247115.25   | 374429.0165 | 413165.4335 | 198235.5565 | 142631.2518 |
| glycerophosphocholine                 | 180810678.7 | 140741585.4 | 154815742.1 | 132554202.3 | 171383462.7 | 140714877.6 | 111354250.4 | 133470211.1 | 182445569.9 | 135367961.1 | 111217866.4 | 80231832.13 |
| glycine                               | 8282.689238 | 8281.87933  | 7251.355565 | NA          | 7242.671378 | 5176.196759 | 6718.913273 | NA          | NA          | NA          | NA          | NA          |
| glycolate                             | 37412.1762  | 27217.59657 | 19669.72313 | 17456.02506 | 35321.70308 | 32973.28587 | 19002.37842 | 23018.87754 | 5430.14579  | NA          | 27223.35804 | 16794.87801 |
| glyoxylate                            | 53702.40283 | 37600.91839 | 31788.52372 | 21418.53625 | 36121.66329 | 32529.7327  | 41828.72818 | 48119.60945 | 40041.56001 | 28388.96857 | 42564.45528 | 50721.26774 |
| GMP                                   | 16685327    | 18409049.5  | 22153143.73 | 22999501.32 | 23373208.04 | 25590254.05 | 20012657.06 | 21909826.86 | 18862909.83 | 19790333.09 | 24006356.21 | 22666518.62 |
| GTP                                   | 2393381.027 | 1070308.38  | 707237.3268 | 557285.1253 | 1011681.306 | 724817.6646 | 896370.9014 | 762177.3196 | 1478529.578 | 509624.4286 | 531147.5203 | 236468.3883 |
| guanidoacetic acid                    | 607931.3177 | 274594.6716 | 228348.1047 | 205481.4401 | 472270.7698 | 188588.4174 | 226081.9681 | 234891.8637 | 288918.529  | 187535.4732 | 142165.0506 | 213846.1538 |
| guanine                               | 206196.3021 | 182941.7224 | 194635.4123 | 81418.24234 | 206346.2399 | 89309.62732 | 89823.94515 | 149124.2798 | 184639.0436 | 66464.6873  | 99205.08492 | 47670.92446 |
| guanosine                             | 291838.5815 | 287863.0557 | 390277.1135 | 189406.1235 | 302548.344  | 193485.2721 | 315275.4223 | 241849.4932 | 365403.2571 | 363484.8174 | 260428.2685 | 137154.8892 |
| guanosine 5-diphosphate,3-diphosphate | 70252.75629 | 55369.37742 | 31056.27985 | 13977.68658 | 14493.28147 | 27962.14604 | 11906.25267 | 36751.4297  | 44002.39545 | 23297.28877 | 12960.14748 | NA          |
| hexose-phosphate                      | 29646718.45 | 19840305.48 | 16464051.68 | 9489478.945 | 18938813.92 | 13289088.12 | 19350889.7  | 14638600.84 | 18717693.93 | 14100934.1  | 10391926.77 | 12150851.14 |
| histidine                             | 9384910.491 | 13102810.44 | 14712356.3  | 7940205.232 | 10034936.71 | 12849885.4  | 6515478.683 | 9968530.758 | 9469726.55  | 8712948.423 | 9520849.152 | 5943528.312 |
| histidinol                            | 167166.1495 | 57079.83072 | 71967.11194 | 61086.26122 | 117013.0493 | 63679.32302 | 40851.58365 | 56941.56403 | 78168.28822 | 54866.77798 | 52280.95111 | 23296.46262 |
| homocysteic acid                      | 149654.5989 | 111756.2942 | 70408.50955 | 33051.13904 | 186599.3834 | 66229.56146 | 48424.71937 | 123351.1318 | 38847.33431 | 21222.83685 | 50762.00958 | 111746.7106 |
| homocysteine                          | 146675.0894 | 87815.20472 | 130153.2854 | 99248.72815 | 172915.1439 | 86584.37055 | 132257.4677 | 72265.06673 | 228022.6505 | 144432.4506 | 122576.2576 | 58128.50535 |
| homoserine                            | 95385.06348 | 88946.9651  | 78585.53504 | 70594.59537 | 81475.87421 | 77129.99464 | 74783.71967 | 99294.41452 | 118711.2778 | 102385.7731 | 62914.90731 | 37350.59185 |
| hydroxyisocaproic acid                | 3117452.148 | 3188737.913 | 2269863.536 | 1135002.754 | 2285467.307 | 1408908.241 | 1682529.779 | 1380428.98  | 1293737.957 | 1920137.941 | 1172888.161 | 937464.2153 |
| hydroxyphenylacetic acid              | 220657.2197 | 318239.6187 | 189370.8571 | 69735.89068 | 182287.1455 | 38875.55908 | 76578.24288 | 157564.8996 | 89883.79604 | 113389.9465 | 49958.92369 | 44640.98523 |
| hydroxyphenylpyruvate                 | 12886.81806 | NA          |
| hydroxyproline                        | 591444.2363 | 544654.3766 | 490661.4148 | 477646.9215 | 579691.3732 | 430547.3495 | 406537.033  | 481649.1426 | 617302.1467 | 452274.3861 | 401656.5309 | 361607.2297 |
| hypoxanthine                          | 20750.79414 | 14428.72021 | 41333.13629 | 40981.10022 | NA          | 9289.01718  | 25382.76229 | NA          | 21160.67073 | 20320.61    | 18852.01471 | 33285.13455 |
| IDP                                   | 2898501.129 | 2137937.364 | 1684640.964 | 1209860.261 | 2008871.709 | 1653699.077 | 1591695.249 | 1779204.225 | 1424103.44  | 913266.1887 | 1187580.354 | 959222.9249 |
| imidazole                             | NA          | NA          | 8461.894394 | 7544.510597 | NA          | NA          | 17848.12374 | NA          | 11241.6957  | 14151.39716 | 16620.88981 | 16810.98862 |
| imidazoleacetic acid                  | 101702.4593 | 56189.87223 | 50453.91549 | 28808.74819 | 37870.79375 | 60496.59186 | 37451.26109 | 80384.67088 | 64203.02365 | 51214.36245 | 61178.88161 | 25051.67835 |
| IMP                                   | 29359143.77 | 26783343.08 | 25452071.19 | 21612157.85 | 31035330.01 | 20742333.61 | 23057897.28 | 26097432.5  | 24095474.59 | 23657417.46 | 20526706.9  | 19810281.91 |
| indole                                | 359874.4528 | 158015.9284 | 169643.8693 | 88052.9575  | 248387.0955 | 148403.3583 | 120630.5918 | 164182.9322 | 209085.3434 | 174729.0211 | 66255.99961 | 93342.63236 |
| indole-3-carboxylic acid              | 248237.6687 | 118821.035  | 101092.8941 | 78095.82365 | 127523.5643 | 92935.57343 | 150716.8981 | 122883.2325 | 78174.31485 | 72741.11348 | 50892.25744 | 148127.1337 |
| indoleacrylic acid                    | 85109.07839 | 106329.9146 | 50873.6171  | 113973.8695 | 142906.5528 | 65620.63277 | 50214.25145 | 100104.0149 | 61876.91932 | 56304.42787 | 36452.4605  | 38841.43852 |
| inosine                               | 77564317.14 | 77702575.5  | 77559034.5  | 62616100.81 | 77413459.26 | 72358047.82 | 79151759.44 | 77020268.31 | 70911097.78 | 75824269.62 | 73883253.27 | 68602630.89 |
| isocitrate                            | 98115.43609 | 45863.15703 | 36985.81536 | 28200.84504 | 43330.21759 | 27890.02747 | 46589.11269 | 56542.46287 | 66316.81543 | 25276.34739 | 41870.88697 | 40623.70848 |
| kynurenic acid                        | 907190.0999 | 668826.0956 | 383672.2969 | 279337.2071 | 450477.2707 | 337927.1123 | 531430.2699 | 658312.2178 | 320923.8    | 245408.573  | 454041.7992 | 491595.1783 |
| kynurenine                            | 24434.71388 | 22702.38812 | 12457.8367  | 12532.09604 | 36506.16483 | 18109.28496 | NA          | 17238.82809 | 30713.89033 | 18216.16627 | 12461.83524 | 13347.66974 |
| lactate                               | 177315439.5 | 126379665.1 | 117780275.3 | 103086802.1 | 141948585   | 104687363.7 | 106421653.4 | 116024627.7 | 118235343.3 | 94021827.87 | 106042267.3 | 108058931.4 |
| L-arginino-succinate                  | 419506.8382 | 390490.0316 | 363048.4464 | 478038.8974 | 481344.699  | 389099.2881 | 336787.0227 | 357936.0134 | 450893.6743 | 305340.7276 | 347280.2627 | 457940.3993 |
| leucine-isoleucine                    | 40501830.73 | 26058856.73 | 21020604.6  | 15303733.42 | 28334905.78 | 17868803.61 | 15218400.91 | 23037647.84 | 27407207.2  | 27436263.6  | 12253855.96 | 11950748.36 |
| lipoate                               | NA          |
| lysine                                | 7631270.849 | 4111944.591 | 2991335.436 | 2133661.107 | 5571956.573 | 2562350.791 | 1505525.303 | 2516277.74  | 6665493.043 | 3986856.052 | 1059482.018 | 1208954.326 |
| malate                                | 25949725.27 | 17305619.84 | 17991729.44 | 23432132.75 | 23962505.4  | 14720433.79 | 27054514.9  | 26104087.61 | 15999084.57 | 10995504.98 | 26107886.78 | 35042218.28 |
| maleic acid                           | 14006456.25 | 8631220.317 | 8689053.537 | 7236480.384 | 10178206.39 | 7810726.077 | 8915056.73  | 8785812.775 | 6848590.103 | 5452948.108 | 8327901.728 | 9254144.017 |

|                                  |             |             |             |             |             |             |             |             |             |             |             |             |
|----------------------------------|-------------|-------------|-------------|-------------|-------------|-------------|-------------|-------------|-------------|-------------|-------------|-------------|
| malonyl-CoA                      | NA          |
| methionine                       | 1575771.292 | 1387939.976 | 1361411.296 | 945568.5106 | 1647507.669 | 1117624.652 | 986286.3207 | 1376471.896 | 1798716.702 | 1365385.818 | 928239.9229 | 712320.2147 |
| methionine sulfoxide             | 172282.929  | 145468.0599 | 195693.1629 | 114922.0855 | 146150.0294 | 114874.1479 | 104805.0831 | 133632.2411 | 189286.2482 | 88010.01195 | 71404.19939 | 61624.43929 |
| methylcysteine                   | 595778.8613 | 470863.5934 | 377559.7197 | 257016.3017 | 402429.0185 | 348335.1682 | 323450.2877 | 366231.5581 | 459038.2561 | 333600.9056 | 318559.2331 | 296839.0517 |
| methylmalonic acid               | 19690948.11 | 11941226.84 | 9214731.114 | 10861839.22 | 10951995.42 | 9423046.018 | 14019237.44 | 12785296.18 | 11674859.86 | 10270040.05 | 11513315.4  | 8312987.581 |
| methylnicotinamide               | NA          | 185185.56   | 148796.9246 | NA          | NA          |
| myo-inositol                     | 130251649.3 | 109611774.5 | 101438261.6 | 78784856    | 120074111.8 | 85461275.95 | 79026273.67 | 97393523.12 | 107701031.5 | 89047498.17 | 56689112.49 | 56543347.05 |
| N6-Acetyl-L-lysine               | 44754275    | 21206095.45 | 19861194.09 | 9934751.782 | 24536941.74 | 14182182.36 | 8202271.598 | 12783752.63 | 36792224.5  | 11010209.68 | 5307265.648 | 5190031.264 |
| N-acetyl-glucosamine             | 74632.07618 | 51126.6145  | 45153.40416 | 38163.30612 | 74019.15057 | 41998.50521 | 49195.34717 | 61982.06898 | 59421.64849 | 44848.09908 | 42296.39916 | 52127.35379 |
| N-acetyl-glucosamine-1-phosphate | 998345.0919 | 884856.8263 | 819846.7236 | 422435.5527 | 841575.982  | 512348.3414 | 587970.9617 | 706151.8372 | 637991.9384 | 579443.5668 | 466930.5513 | 408280.3589 |
| N-acetyl-glutamate               | 1552105.448 | 744729.5194 | 685136.6892 | 513898.8704 | 987217.5728 | 543055.7417 | 473714.0774 | 773912.0814 | 1020248.525 | 682617.2906 | 434230.9028 | 418785.1921 |
| N-acetyl-glutamine               | 1770375.394 | 890840.5877 | 813346.8925 | 210855.9656 | 1490995.632 | 230280.5224 | 483176.6373 | 738496.563  | 1253329.587 | 827015.8461 | 304844.4527 | 425735.766  |
| N-Acetyl-L-alanine               | 141267136.6 | 109721120.5 | 101786852.1 | 88440432.68 | 113179608.7 | 83704678.64 | 91156643.06 | 96451074.15 | 95719914.13 | 87196070.62 | 74163334.14 | 76833546.53 |
| N-acetyl-L-ornithine             | 64411.32261 | 32176.83993 | 36741.81303 | 32704.84985 | 70556.95358 | 41680.0814  | 41996.24977 | 44188.37166 | 71423.85295 | 37816.96499 | 29215.3968  | 25898.58587 |
| N-Acetylputrescine               | NA          |
| NAD+                             | 16877569.68 | 9332142.668 | 10487125.08 | 5813318.714 | 11306579.07 | 6263784.586 | 12631222.37 | 11269894.11 | 11065887.23 | 6412327.201 | 12618039.39 | 3449276.518 |
| NADH                             | 983353.8952 | 1338905.007 | 1181271.053 | 373876.9473 | 832140.6516 | 2390691.505 | 272833.7006 | 685713.5479 | 992333.5145 | 608674.2964 | 820517.8248 | 137199.8495 |
| NADP+                            | 759336.3819 | 826650.0255 | 869832.7003 | 542647.0621 | 718688.4527 | 767118.5463 | 994443.5265 | 978800.0266 | 751097.265  | 667378.7495 | 762405.8308 | 280453.0766 |
| NADPH                            | NA          | NA          | NA          | NA          | NA          | 10869.54727 | NA          | NA          | NA          | NA          | NA          | NA          |
| N-carbamoyl-L-aspartate          | 447761.3484 | 265768.7048 | 254227.5202 | 321517.0311 | 357573.149  | 184304.604  | 176532.8016 | 188010.8429 | 375839.2284 | 240638.8291 | 234012.8083 | 135674.3436 |
| Ng,NG-dimethyl-L-arginine        | 2011683.659 | 1450489.711 | 660060.2879 | 753419.4359 | 1049849.998 | 721969.3816 | 650915.7188 | 857520.4796 | 2552835.972 | 742927.9645 | 623788.0583 | 537260.227  |
| nicotinamide                     | 265647130.5 | 180660871   | 231556219.9 | 191480624.8 | 306451334   | 185405155.9 | 133873415.8 | 187505964.5 | 220541794.3 | 217004979.1 | 73390944.99 | 132336700.3 |
| nicotinamide ribotide            | 373527.3511 | 428737.0336 | 360564.7451 | 280952.8724 | 487448.9998 | 315865.1117 | 308783.1745 | 456432.6854 | 400599.4542 | 283329.1888 | 267214.7419 | 204727.3851 |
| nicotinate                       | 80658.25031 | 110715.7709 | 91820.70602 | 100911.1884 | 114051.9674 | 91807.62122 | 289529.4402 | 178831.1693 | 292295.7233 | 181124.5896 | 187919.8764 | 134113.0292 |
| O8P-O1P                          | 965428.2784 | 598096.4945 | 588845.5062 | 522057.233  | 692001.1253 | 452335.3005 | 509156.2319 | 572073.8853 | 603652.9326 | 457189.4613 | 404474.9999 | 375356.183  |
| O-acetyl-L-serine                | 62876.01674 | 54666.34083 | 23409.51547 | 21129.4519  | 52580.71136 | 29811.08273 | 21517.91121 | 34425.55748 | 47293.77563 | 29954.39987 | 12662.07936 | 16913.5304  |
| OBP                              | 223966.9668 | 210777.6995 | 232870.9806 | 133872.4902 | 168945.2715 | 140922.4895 | 174240.4587 | 155188.4376 | 145542.779  | 117393.517  | 117490.0377 | 133067.2881 |
| ornithine                        | 80933.96604 | 91498.7868  | 58520.43512 | 67292.77061 | 125420.6396 | 75196.72068 | 45109.37488 | 74098.38257 | 74818.37558 | 66330.53699 | 49880.27052 | 39817.02957 |
| orotate                          | 259097.1495 | 160412.1072 | 156092.6827 | 125140.5913 | 135328.3577 | 118706.42   | 245755.4159 | 206210.6184 | 147318.1003 | 111221.0403 | 98134.50333 | 164581.0905 |
| orotidine-5-phosphate            | NA          | NA          | NA          | NA          | NA          | 9318.981495 | NA          | 9318.434492 | NA          | NA          | 9730.485761 | 7761.059797 |
| oxaloacetate                     | 323250.4449 | 188768.8441 | 143434.2362 | 192945.5319 | 250995.2877 | 259128.4563 | 282183.7832 | 141374.671  | 196391.3442 | 118644.945  | 250563.1327 | 397288.6883 |
| p-aminobenzoate                  | 1035397.022 | 660397.1002 | 422954.7475 | 359890.9693 | 669780.4757 | 263716.311  | 462880.9957 | 452339.7739 | 919830.5679 | 805311.9212 | 342515.6392 | 171022.3976 |
| pantothenate                     | 11936726.41 | 5972719.589 | 5867332.318 | 3975279.965 | 7262899.018 | 4440083.436 | 4537625.252 | 4989405.424 | 4784085.495 | 2995888.908 | 4240818.286 | 4313290.881 |
| phenylalanine                    | 18105472.59 | 8355788.926 | 8831016.735 | 6037239.088 | 12541670.84 | 7694026.555 | 5728747.218 | 7591297.501 | 14520527.92 | 8964875.07  | 4176552.483 | 4423994.709 |
| phenyllactic acid                | 443236.2187 | 433735.9605 | 271608.466  | 308548.6583 | 402053.2159 | 145471.5739 | 197248.6208 | 203078.9638 | 247902.3877 | 276419.7842 | 121148.948  | 184818.7432 |
| phenylpropionic acid             | 465390.7013 | 159204.0834 | 151651.1799 | 121199.0189 | 284205.7514 | 185763.3249 | 382015.3103 | 299063.5244 | 245811.3641 | 157218.1414 | 195372.0865 | 349384.1204 |
| phenylpyruvate                   | 13964.95086 | 19664.23534 | 13980.3043  | NA          | 24884.31281 | NA          | NA          | 9835.835638 | 12433.78094 | 7250.3268   | NA          | NA          |
| phosphoenolpyruvate              | 2519964.053 | 504950.1852 | 210692.099  | 48533.91831 | 202708.5615 | 87929.69788 | 637592.7375 | 197451.9616 | 739830.3471 | 106831.1765 | 248503.8765 | 95300.41173 |
| phosphorylcholine                | 246130515.6 | 204912098.4 | 197673993.9 | 147475914.1 | 220587929.5 | 183546892.5 | 161285739   | 183168011.2 | 232738253.8 | 197931553.5 | 112989396.3 | 101442807.4 |
| p-hydroxybenzoate                | 2699343.004 | 2594169.588 | 3596813.529 | 660560.194  | 2236472.362 | 850056.9498 | 1212041.175 | 1558219.045 | 1729371.788 | 1257507.444 | 1106945.075 | 510630.8633 |
| prephenate                       | NA          |
| proline                          | 28600135.22 | 25511682.19 | 27616227.81 | 18664176.1  | 31008693.3  | 19568749.92 | 14106502.53 | 27318227.83 | 25970931.11 | 28371650.15 | 14189891.43 | 10386350.74 |
| propionyl-CoA                    | 77820.76954 | 20629.13401 | 33518.76487 | 19161.59049 | 51735.3012  | 37794.85822 | 25360.03035 | 21206.96513 | 40901.01454 | 14493.11797 | 25369.56734 | 26911.31096 |
| purine                           | 341184.3026 | 185727.8286 | 155704.3111 | 102921.864  | 278363.2022 | 132042.9085 | 89262.84967 | 160159.1841 | 279512.2405 | 131688.0991 | 74573.26594 | 71720.52309 |
| putrescine                       | 63250.97624 | 35561.69984 | 24256.76529 | 111678.1938 | 10334.12589 | 26096.89144 | 156410.5229 | NA          | 4424.910408 | 89168.32638 | 20000.78516 | 43522.15452 |

|                                   |             |             |              |             |             |             |             |             |             |             |             |             |
|-----------------------------------|-------------|-------------|--------------|-------------|-------------|-------------|-------------|-------------|-------------|-------------|-------------|-------------|
| pyridoxamine                      | 22923.40624 | NA          | 30612.09366  | 42509.31361 | 25249.62063 | 22440.46581 | 17943.53041 | NA          | 106276.7618 | NA          | NA          | NA          |
| pyridoxine                        | 10612.47838 | NA          | 8137.035531  | NA          | 11999.81702 | NA          | 14710.16898 | NA          | NA          | 11623.65549 | NA          | NA          |
| pyroglutamic acid                 | 293286.9488 | 337365.432  | 438658.5364  | 382043.3547 | 423803.5081 | 240101.1933 | 313024.2548 | 266871.0523 | 565241.4339 | 433385.6962 | 238814.3676 | 304103.5715 |
| pyrophosphate                     | 7036140.187 | 3756845.743 | 3766091.548  | 2212201.942 | 4411417.609 | 2343562.305 | 2830140.615 | 3217884.365 | 3731159.742 | 2716701.647 | 1758716.871 | 1814230.867 |
| pyruvate                          | 121034.6931 | 81168.68413 | 69860.70736  | 50165.28604 | 63502.1156  | 50632.2085  | 67685.26445 | 74132.16627 | 59626.78951 | 42370.12315 | 71821.38749 | 56917.2134  |
| quinolinate                       | 6454.44333  | 8937.973048 | 10613.80095  | 20848.37616 | 13297.46891 | 13074.73195 | 6689.957007 | NA          | 51666.66337 | 6551.53277  | NA          | 17526.21617 |
| riboflavin                        | 128130.1646 | 174685.4209 | 128562.1013  | 107103.3679 | 220021.04   | 183810.1034 | 82681.39115 | 169221.0961 | 97328.16214 | 130098.0203 | 88018.24446 | 98497.95733 |
| ribose-phosphate                  | 6075940.35  | 6279360.354 | 8815013.922  | 4853857.363 | 9816551.351 | 4786864.026 | 6237090.962 | 6120760.667 | 8498418.26  | 8103977.457 | 3085741.034 | 5174364.541 |
| S-adenosyl-L-homocysteine         | 1224109.391 | 1002768.269 | 964745.0387  | 273048.275  | 1012267.447 | 552039.4621 | 588320.8522 | 743330.1328 | 461462.5828 | 407066.6607 | 662605.5753 | 431061.9383 |
| S-adenosyl-L-methioninamine       | NA          | NA          | NA           | NA          | NA          | NA          | NA          | NA          | NA          | NA          | NA          | NA          |
| S-adenosyl-L-methionine           | 12590355.7  | 6909355.425 | 6161508.114  | 4013622.162 | 8019497.269 | 4618799.713 | 2851948.821 | 5468207.914 | 12366113.4  | 6203951.433 | 2638436.898 | 2539546.565 |
| sarcosine                         | 13844474.64 | 12121490.62 | 11095540.68  | 9847736.354 | 11359222.94 | 8623944.531 | 8757693.127 | 11138260.3  | 12712959.81 | 13279543.34 | 7230927.308 | 5857793.102 |
| SBP                               | 1432807.794 | 1144937.245 | 955518.0198  | 499451.5926 | 977207.1653 | 754133.1792 | 670325.7665 | 600907.9332 | 838569.4908 | 746321.6721 | 383308.9361 | 360632.4124 |
| serine                            | 14895640.64 | 16405053.41 | 13955887.88  | 15133823.75 | 16579571.32 | 14595576.49 | 12015885.3  | 14537984.73 | 15242901.84 | 11772528.78 | 9990076.17  | 10139727.78 |
| shikimate                         | 1715475.767 | 1217469.694 | 86602.43625  | 84387.7385  | 137187.1518 | 167734.166  | 122181.0481 | 665235.9352 | 101449.303  | 363163.9169 | 23343.81481 | 10859.65139 |
| shikimate-3-phosphate             | 14893.98155 | NA          | 13481.87366  | NA          | 13442.34214 | NA          | 4749.266464 | 30664.63476 | 24911.77904 | NA          | NA          | NA          |
| S-methyl-5-thioadenosine          | NA          | 7572009.685 | 3882910.123  | 3375131.968 | 3302427.947 | 1175398.443 | 2926155.546 | 5220731.263 | 8762036.323 | 4231912.836 | 3572021.918 | 1789056.962 |
| sn-glycerol-3-phosphate           | 22082392.07 | 15311268.05 | 10790382.72  | 5376478.241 | 12395981.77 | 2921966.159 | 5271758.992 | 10408798.88 | 9518761.001 | 8916785.518 | 11031480.84 | 854685.9068 |
| spermidine                        | 189124.0971 | 257175.2412 | 225660.9438  | 322789.7853 | 152046.6756 | 259112.9264 | 402632.3977 | 222216.904  | 147883.4679 | 200002.3902 | 245220.1273 | 335050.5461 |
| spermine                          | NA          | NA          | NA           | NA          | NA          | NA          | NA          | NA          | NA          | NA          | NA          | NA          |
| S-ribosyl-L-homocysteine          | 27903.38571 | 16637.47297 | 32606.77834  | 16060.26041 | 39823.0504  | 28482.16792 | 27956.35651 | 29508.08502 | 42451.10166 | 12940.07942 | 14994.46921 | 21747.07027 |
| succinate                         | 17599315.14 | 12828605.06 | 7647918.013  | 9009928.922 | 8523450.124 | 5689288.652 | 11476707.44 | 9788575.31  | 9725936.298 | 8492821.482 | 8868729.824 | 6537057.064 |
| succinyl-CoA-methylmalonyl-CoA    | NA          | NA          | NA           | NA          | NA          | NA          | NA          | NA          | NA          | NA          | NA          | NA          |
| succinyl-CoA                      | 94361.54969 | 18488.69509 | 30019.07416  | 7248.469659 | 22809.99099 | 22778.9917  | 40226.34557 | 12424.62831 | 16604.48719 | 9271.204484 | 7768.980353 | 13458.68414 |
| taurine                           | 162427803.3 | 145632470.9 | 141457786.3  | 114083513.5 | 166896456.5 | 116809694.4 | 115596284.8 | 135862410.5 | 153201323.8 | 135031512.7 | 107059595.3 | 93284731.93 |
| taurodeoxycholic acid             | 12941.55234 | 9866.533319 | 7758.750092  | NA          | 8801.456493 | NA          | NA          | 7765.271757 | NA          | NA          | NA          | NA          |
| thiamine                          | NA          | NA          | NA           | NA          | NA          | NA          | NA          | NA          | NA          | NA          | NA          | NA          |
| thiamine pyrophosphate            | 926126.9714 | 535934.3061 | 325760.644   | 219896.0854 | 361337.6341 | 284756.0036 | 440892.8241 | 539976.5298 | 298993.3199 | 215760.9076 | 314656.8151 | 145260.4857 |
| thiamine-phosphate                | 345436.6807 | 290662.3921 | 285781.2423  | 275296.4542 | 408709.6949 | 292090.0621 | 71344.19156 | 263948.8772 | 498369.9868 | 332372.8878 | 146804.7239 | 159191.653  |
| threonine                         | 21015836.26 | 16097775.27 | 18679167.63  | 12007322.83 | 20019022.66 | 12390866.12 | 10787813.76 | 15297094.94 | 21813401.06 | 17658679.76 | 6663398.488 | 8079931.757 |
| thymidine                         | NA          | 38873.39959 | 64709.73434  | 7638.893134 | 26044.23492 | 17764.0311  | 29365.3951  | 41752.64093 | 69372.06006 | 34685.82259 | 21745.37609 | 40244.27617 |
| thymine                           | 18205.03296 | 11237.82278 | 112298.54415 | 19559.01424 | 19729.1311  | 35632.24578 | 43011.8996  | 24632.3078  | 20973.58055 | 32858.51043 | 18422.29064 | 16443.98808 |
| trans, trans-farnesyl diphosphate | 12442.31088 | 12697.56811 | 9174.374704  | NA          | 20978.44953 | NA          | NA          | 9707.042578 | 16020.36101 | NA          | NA          | NA          |
| trehalose-6-phosphate             | 64797.02911 | 131114.6185 | 130447.9112  | 83051.2155  | 32676.7791  | 93374.92323 | 70923.07646 | 124235.4007 | 130908.7524 | 89403.48347 | 10938.94645 | 47347.18248 |
| trehalose-sucrose                 | 597766.3522 | 771533.46   | 686798.9033  | 558707.7891 | 2097766.871 | 840508.5563 | 1419655.168 | 1625022.292 | 1088979.252 | 216619.9723 | 268835.5185 | 2008655.714 |
| tryptophan                        | 2722119.873 | 1475489.923 | 1408215.204  | 1072303.231 | 2345240.065 | 1417964.318 | 1053116.448 | 1514671.528 | 2397541.369 | 1353471.523 | 839000.8189 | 950544.1569 |
| tyrosine                          | 1013123.542 | 790231.2231 | 948897.3892  | 624376.3179 | 831417.0279 | 789439.419  | 685315.2923 | 803409.1569 | 1095975.02  | 766591.7152 | 625287.3759 | 686332.1108 |
| UDP-D-glucose                     | 7362551.85  | 3632674.954 | 3316276.041  | 2281531.353 | 4772625.558 | 2365731.543 | 2469390.179 | 3334379.78  | 3056495.785 | 1962131.813 | 1885061.59  | 2080848.763 |
| UDP-D-glucuronate                 | 351138.1146 | 168762.4965 | 227262.8892  | 94741.59403 | 261954.1609 | 163074.5169 | 115438.9778 | 164629.274  | 164528.8901 | 141333.4242 | 136158.3377 | 99919.70154 |
| UDP-N-acetyl-glucosamine          | 1663283.789 | 803399.0257 | 974793.6644  | 555004.7035 | 1143922.486 | 625768.826  | 491340.3442 | 809447.7362 | 783695.4334 | 572685.3251 | 492301.3918 | 418839.5168 |
| UDP                               | 1696884.859 | 1587233.108 | 1230595.147  | 768903.7861 | 1518424.565 | 1268098.03  | 795577.4508 | 1454109.147 | 769470.841  | 636266.2431 | 843838.2922 | 571842.1533 |
| UMP                               | 1159293.096 | 1136207.782 | 1213479.626  | 1003553.094 | 1387025.87  | 1184937.934 | 626764.6361 | 1224447.727 | 1273624.886 | 914688.984  | 919151.6625 | 930629.7982 |
| uracil                            | 14256055.49 | 11137976.37 | 11163447.83  | 3713587.634 | 13428429.98 | 4575515.19  | 9452766.198 | 8342287.983 | 7184214.685 | 7993778.119 | 5832209.591 | 4159175.559 |
| urea                              | 14824828.98 | 10438777.62 | 8541177.676  | 5471974.606 | 12056776.73 | 6027389.758 | 4773763.285 | 7330492.787 | 12616065.16 | 9014821.901 | 5527767.059 | 3734722.383 |
| uric acid                         | 289592.8205 | 111902.9181 | 126328.4632  | 52952.79104 | 116063.5672 | 62449.62829 | 102408.6012 | 113330.2892 | 112171.1574 | 45984.33595 | 74465.03162 | 167224.163  |

|                        |             |             |             |             |             |             |             |             |             |             |             |             |
|------------------------|-------------|-------------|-------------|-------------|-------------|-------------|-------------|-------------|-------------|-------------|-------------|-------------|
| uridine                | 32766.28059 | NA          | NA          | NA          | 21617.22258 | 11549.71481 | NA          | 19769.56043 | 13509.75182 | NA          | NA          | NA          |
| UTP                    | 516256.3514 | 614999.4929 | 447506.4656 | 103569.0844 | 461640.8792 | 465056.9595 | 137067.222  | 335982.2949 | 362115.2533 | 129918.6893 | 270715.9204 | 129423.4464 |
| valine                 | 538594.3087 | 662106.6196 | 525266.397  | 367335.9719 | 674816.3953 | 467973.4063 | 371986.2016 | 457095.897  | 554086.6996 | 642428.8598 | 274784.2618 | 306924.7511 |
| xanthine               | 8924803.917 | 5590722.778 | 6753322.519 | 2362644.548 | 5307699.027 | 3127835.33  | 6124557.157 | 4089704.487 | 4444027.983 | 3579519.202 | 3111547.876 | 3430253.652 |
| xanthosine             | 164134.9488 | 484523.1471 | 137437.9557 | 67902.21977 | 444139.7048 | 75963.98836 | 161359.5875 | 72267.69942 | 73926.60833 | 87325.23421 | 100528.5434 | 79378.72209 |
| xanthosine-5-phosphate | NA          | 13534.89736 | NA          | NA          | 8293.100653 | 7739.189104 | NA          | NA          | NA          | NA          | NA          | NA          |
| xanthurenic acid       | 202521.232  | 159095.6727 | 123392.2452 | 114563.8774 | 130014.2811 | 113126.1271 | 234666.2896 | 169749.9245 | 87429.02911 | 64301.81176 | 147296.9387 | 132954.0227 |

NA: not available.
